# Supplementary material for: p-Phenylenediamine Derivatives in Tap Water: Implications for Human Exposure
Source: MDPI journal article supplement (doi:10.3390/w16081128), 2024-04-16
Supplement: s1 [file s1]

## **Supporting Information**

### ***p*-Phenylenediamine Derivatives in Drinking Water: Implication for Human Exposure**

Jianqiang Zhu<sup>1</sup>; Ruyue Guo<sup>2</sup>; Fangfang Ren<sup>2</sup>; Shengtao Jiang<sup>1</sup>; Hangbiao Jin<sup>2,\*</sup>

<sup>1</sup> Department of Environmental Engineering, Taizhou University, Taizhou, Zhejiang 318000, P. R. China.

<sup>2</sup> Key Laboratory of Microbial Technology for Industrial Pollution Control of Zhejiang Province, College of Environment, Zhejiang University of Technology, Hangzhou, Zhejiang 310032, P. R. China.

**Table S1. List of *p*-Phenylenediamine Antioxidants Monitored in This Study and Their Abbreviation, Full Name, CAS Number, and Chemical Structure.**

| Abbreviation | Full name                                          | CAS          | Chemical structure |
|--------------|----------------------------------------------------|--------------|--------------------|
| IPPD         | N-isopropyl-N'-phenyl-1,4-phenylenediamine         | 101-72-4     |                    |
| DPPD         | N, N'-diphenyl-p-phenylenediamine                  | 2687960-60-5 |                    |
| CPPD         | N-phenyl-N'-cyclohexyl-p-phenylenediamine          | 101-87-1     |                    |
| 6PPD         | N-(1,3-dimethylbutyl)-N'-phenyl-p-phenylenediamine | 793-24-8     |                    |
| 7PPD         | (1,4-dimethylpentyl)-N'-phenylbenzene-1,4-diamine  | 3081-01-4    |                    |
| 44PD         | N, N'-Di-2-butyl-p-phenylenediamine                | 101-96-2     |                    |
| 77PD         | N, N-Bis(1,4-dimethylpentyl)-p-phenylenediamine    | 3081-14-9    |                    |
| DTPD         | N, N'-di(o-tolyl)-p-phenylenediamine               | 15017-02-4   |                    |
| DNPD         | N, N'-di-2-naphthyl-p-phenylenediamine             | 93-46-9      |                    |

**Table S2. Source of the Collected Drinking Water in Hangzhou and Taizhou.**

| <b>Site</b>          |                           | <b><i>n</i></b> | <b>Source typology</b> |
|----------------------|---------------------------|-----------------|------------------------|
| <b>Hangzhou city</b> | <b>Linping district</b>   | 53              | Tiaoxi River           |
|                      | <b>Xiaoshan district</b>  | 31              | Qiantang River         |
|                      | <b>Fuyang district</b>    | 47              | Fuchunjiang River      |
| <b>Taizhou city</b>  | <b>Jiaojiang district</b> | 30              | Lingjiang River        |

**Table S3. MRM Transition Parameters for Analyzing PPDs and Internal Standard.**

|                                        | Parent ion | Daughter ion | Cone voltage (eV) | Collision energy (eV) |
|----------------------------------------|------------|--------------|-------------------|-----------------------|
| <b>IPPD</b>                            | 227        | 184          | 35                | 19                    |
|                                        |            | 107          | 35                | 24                    |
| <b>DPPD</b>                            | 261        | 167          | 40                | 22                    |
|                                        |            | 107          | 40                | 31                    |
| <b>CPPD</b>                            | 267        | 107          | 43                | 23                    |
|                                        |            | 84           | 43                | 35                    |
| <b>6PPD</b>                            | 269        | 184          | 40                | 27                    |
|                                        |            | 166          | 40                | 27                    |
| <b>DTPD</b>                            | 289        | 180          | 43                | 25                    |
|                                        |            | 92           | 43                | 35                    |
| <b>DNPD</b>                            | 361        | 217          | 45                | 28                    |
|                                        |            | 234          | 45                | 20                    |
| <b>7PPD</b>                            | 283        | 184          | 40                | 20                    |
|                                        |            | 93           | 40                | 35                    |
| <b>44PD</b>                            | 221        | 135          | 37                | 20                    |
|                                        |            | 164          | 37                | 15                    |
| <b>77PD</b>                            | 305        | 206          | 39                | 25                    |
|                                        |            | 135          | 39                | 41                    |
| <b><sup>13</sup>C<sub>6</sub>-6PPD</b> | 275        | 190          | 40                | 27                    |

**Table S4. LODs and Extraction Recoveries of Target Analytes in Human Urine.**

|             | LOD<br>(ng/L) | Extraction Recovery (%) |    |                  |    |                   |    |
|-------------|---------------|-------------------------|----|------------------|----|-------------------|----|
|             |               | Spiked at 0.1 ng/L      |    | Spiked at 1 ng/L |    | Spiked at 10 ng/L |    |
|             |               | Mean                    | SD | Mean             | SD | Mean              | SD |
| <b>IPPD</b> | 0.027         | 84                      | 4  | 109              | 7  | 107               | 3  |
| <b>DPPD</b> | 0.044         | 100                     | 5  | 81               | 5  | 106               | 9  |
| <b>CPPD</b> | 0.019         | 91                      | 9  | 105              | 8  | 93                | 6  |
| <b>6PPD</b> | 0.055         | 82                      | 9  | 96               | 7  | 100               | 7  |
| <b>7PPD</b> | 0.052         | 106                     | 8  | 86               | 9  | 87                | 5  |
| <b>44PD</b> | 0.031         | 86                      | 6  | 100              | 8  | 105               | 8  |
| <b>77PD</b> | 0.063         | 86                      | 5  | 87               | 2  | 102               | 7  |
| <b>DTPD</b> | 0.048         | 85                      | 8  | 92               | 7  | 106               | 10 |
| <b>DNPD</b> | 0.070         | 101                     | 7  | 106              | 2  | 84                | 11 |

**Table S5. Correlations among Concentrations (ng/L) of Various PPDs in Hangzhou Drinking Water.**

|             |                             | <b>CPPD</b> | <b>IPPD</b> | <b>44PD</b> | <b>6PPD</b> |
|-------------|-----------------------------|-------------|-------------|-------------|-------------|
| <b>CPPD</b> | <b>Spearman Correlation</b> | 1           | 0.249       | 0.149       | 0.320       |
|             | <b>Sig. (2-tailed)</b>      |             | 0.435       | 0.238       | 0.227       |
| <b>IPPD</b> | <b>Spearman Correlation</b> |             | 1           | 0.165       | 0.399       |
|             | <b>Sig. (2-tailed)</b>      |             |             | 0.672       | 0.190       |
| <b>44PD</b> | <b>Spearman Correlation</b> |             |             | 1           | 0.266       |
|             | <b>Sig. (2-tailed)</b>      |             |             |             | 0.404       |

**Table S6. Correlations among Concentrations (ng/L) of Various PPDs in Taizhou Drinking Water.**

|             |                             | <b>44PD</b> | <b>CPPD</b> | <b>7PPD</b> |
|-------------|-----------------------------|-------------|-------------|-------------|
| <b>6PPD</b> | <b>Spearman Correlation</b> | 0.394       | 0.173       | 0.331       |
|             | <b>Sig. (2-tailed)</b>      | 0.381       | 0.891       | 0.469       |
| <b>44PD</b> | <b>Spearman Correlation</b> | 1           | 0.330       | 0.419       |
|             | <b>Sig. (2-tailed)</b>      |             | 0.279       | 0.084       |
| <b>CPPD</b> | <b>Spearman Correlation</b> |             | 1           | 0.409       |
|             | <b>Sig. (2-tailed)</b>      |             |             | 0.374       |

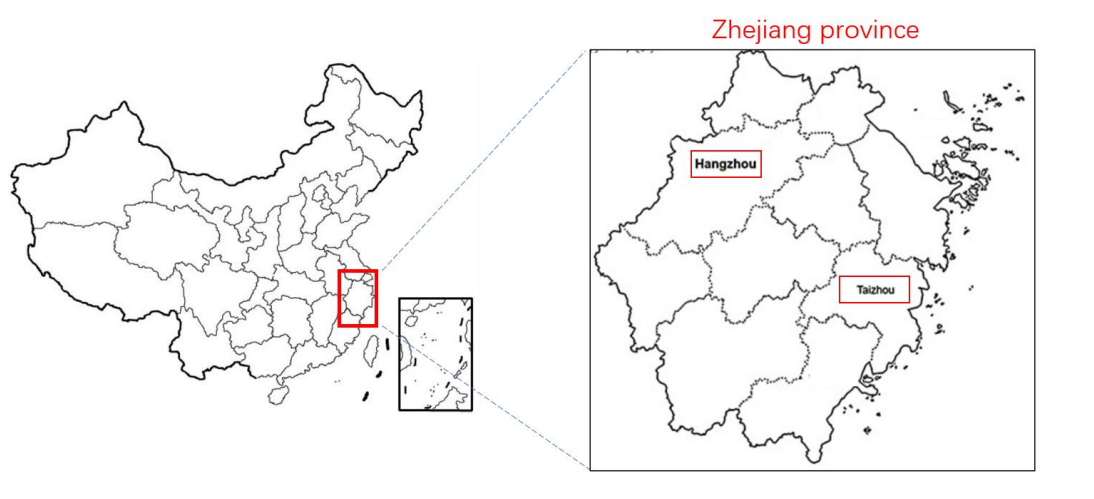

**Figure S1.** The map of sampling regions in this study, Hangzhou city and Taizhou city.

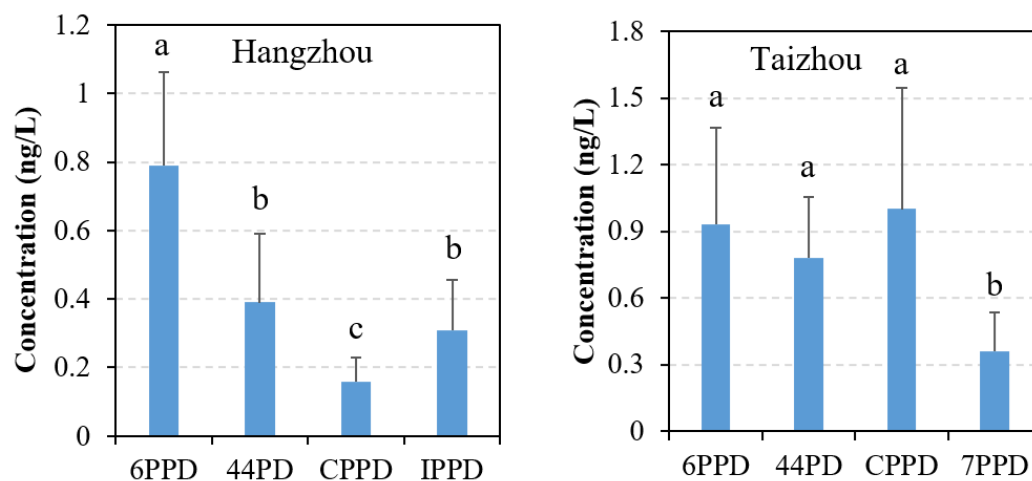

**Figure S2.** Concentrations (mean  $\pm$  SD) of detected PPDs in drinking water samples from Hangzhou and Taizhou. Different alphabets mean the significant difference in concentrations.
